# Supplementary material
Source: publisher figshare collection journal article supplement (https://rs.figshare.com/ndownloader/files/15288842)
Supplement: Supplementary file 1 [file 15288842]

## Sheet: Sheet1
Species	Killer_high_ranking?	Killer_subordinate?	Killer_old?	Killer_young?	Killer_pregnant?	Killer_with_dependant_young?	Killer_pregnant_or_with_dependent_offspring	Victims_dependent?	Victims_altricial?	Killer_&_victims_related?	Killer_&_victims_in_same_social_group?	Offspring_sex?	Killer_&_victim_share_burrow?	Captvity?	Victim_litter_size?	Attempt_to_suckle_by_victim?	Communal_nursing_observed?
Acomys_cahirinus	na	na	yes	no	no	yes	yes	newborns	no	na	na	na	no	yes	2	no	yes
Aethomys_namaquensis	na	na	na	na	na	na	na	na	na	na	na	na	na	yes	na	na	na
Apodemus_sylvaticus	na	na	na	na	yes	no	yes	unweaned	yes	yes	yes	both	yes	no	4	no	yes
Arctocephalus_gazella	na	na	na	na	no	yes	yes	newborns	yes	na_(probably_not)	yes_(colony)	both	no	na	1	yes	yes
Callithrix_flaviceps	yes	no	yes	no	no	yes	yes	unweaned	yes	yes	yes	both	no	no	2	no	yes
Callithrix_jacchus	yes	na	yes	no	na	no	na	unweaned	yes	no	no	na	no	no	1	no	no
Callithrix_jacchus	yes	yes	yes	yes	yes	no	yes	na	yes	yes	yes	na	no	no	1	no	yes
Callorhinus_ursinus	na	na	na	na	no	yes	yes	unweaned	yes	na_(probably_not)	yes_(colony)	both	no	no	1	yes	yes
Canis_dingo	yes	no	na	na	no	yes	yes	newborns	yes	yes	yes	both	no	yes	4	no	yes
Canis_latrans	na	na	na	na	na	na	na	na	yes	no	no	na	no	no	na	no	yes
Canis_lupus	yes	no	yes	no	no	yes	yes	unweaned	yes	na	yes	both	no	no	2	yes	yes
Canis_mesomelas	na	na	na	na	na	na	na	na	yes	na	na	na	na	no	na	na	yes
Canis_simensis	yes	no	na	na	na	na	na	na	yes	yes	yes	na	yes	no	na	na	yes
Clethrionomys_glareolus	no	no	yes	yes	yes	yes	yes	unweaned	yes	no	no	both	no	no	4	no	no
Crocuta_crocuta	yes	occasionally	both	yes	no	yes	yes	unweaned	yes	yes	yes	both	no	no	2	no	no
Cynomys_ludovicianus	yes	yes	both	yes	no	yes	yes	unweaned_and_post-emergent	yes	yes	yes	both	no	no	3	na	no
Dicrostonyx_groenlandicus	yes	no	na	na	na	na	na	unweaned	yes	no	no	both	no	yes	na	no	no
Equus_zebra	yes	no	yes	no	no	yes	yes	na	no	no	yes	both	no	no	1	no	no
Eulemur_fulvus	yes	na	yes	na	na	na	na	unweaned	no	na	yes	na	no	no	1	na	na
Eulemur_macaco	no	no	no	yes	no	yes	yes	weaned	no	na	yes	na	no	no	1	na	no
Galea_musteloides	yes	yes	yes	yes	yes	yes	yes	unweaned_(less_than_8_days)	yes	na	yes	both	no	yes	4	yes	yes
Halichoerus_grypus	na	na	na	na	no	yes	yes	unweaned	yes	na_(probably_not)	yes_	both	no	no	1	na	yes
Heterocephalus_glaber	yes	yes_(rarely)	yes	yes	yes	no	yes	unweaned	yes	yes	yes	both_	yes	no	4	no	yes
Hyaena_brunnea	yes	no	yes	no	no	yes	yes	unweaned	yes	yes	yes	both	yes	no	2	na	yes
Lasiopodomys_brandtii	na	na	na	na	na	na	na	weaned	yes	no	no	both	no	yes	na	no	no
Lemmus_lemmus	na	na	yes	na	na	yes	yes	unweaned	yes	no	no	na	no	no	na	na	no
Lemur_catta	yes	no	yes	no	no	yes	yes	unweaned	no	yes_and_no	yes	both	no	no	1	no	no
Leontopithecus_chrysomelas	yes	no	yes	no	yes	na	yes	unweaned	yes	yes	yes	both	no	yes	2	no	yes
Leptonychotes_weddellii	na	na	na	na	na	na	na	na	na	na	na	na	na	na	na	na	yes
Lycaon_pictus	yes	no	na	na	na	na	na	newborns	yes	yes	yes	both	yes	no	8	na	yes
Macaca_mulatta	yes	no	na	na	na	na	na	na	no	no	yes	both	no	yes	1	no	no
Macaca_nemestrina	yes	no	na	na	na	na	na	na	no	no	yes	both	no	yes	1	no	no
Macaca_radiata	yes	no	yes	no	no	yes	yes	unweaned_(but_can_be_up_to_4_years_old)	no	no	yes	females	no	yes	1	no	no
Macaca_sylvanus	yes	no	no	yes	no	no	no	newborns	yes	no	not_necessarily	both	no	no	1	no	no
Macaca_tonkeana	yes	no	yes	no	no	yes	yes	na	no	no	yes	na	no	yes	1	no	na
Marmota_caligata	yes	no	yes	no	na	na	na	na	yes	na	yes	na	na	no	na	na	yes
Marmota_flaviventris	na	na	na	na	no	yes	yes	unweaned	yes	yes_(aunt/niece)	yes	both	no	no	4	no	no
Marmota_marmota	yes	no	na	na	na	na	na	na	yes	yes	yes	na	na	no	na	na	na
Megaderma_lyra	na	na	na	na	na	na	na	na	na	na	na	na	na	no	na	na	na
Meles_meles	yes	no	yes	no	na	na	na	unweaned	yes	no	yes	both	yes	no	na	na	no
Meriones_unguiculatus	na	na	yes	no	na	na	na	unweaned	yes	no	no	both	no	yes	na	no	no
Meriones_unguiculatus	yes	yes	yes	yes	yes	no	yes	newborns	yes	no	yes	na	yes	yes	na	no	yes
Mesocricetus_auratus	na	na	na	na	yes	no	yes	unweaned	yes	na	yes	both	na	no	na	na	na
Microtus_agrestis	na	na	na	na	yes	yes	yes	unweaned	yes	no	no	both	no	yes	na	no	no
Microtus_canicaudus	na	na	na	na	na	na	na	na	na	no	na	na	no	no	na	na	na
Microtus_ochrogaster	no	no	no	yes	no	no	no	unweaned	na	no	no	na	no	yes	na	na	na
Microtus_pennsylvanicus	na	na	yes	no	yes	no	yes	newborns	yes	no	no	na	no	yes	na	no	no
Microtus_townsendii	na	na	na	na	na	na	na	unweaned_(first_week)	yes	na	na	both	na	no	5	na	no
Mirounga_angustirostris	yes	no	yes	no	no	yes	yes	unweaned	yes	na_(probably_not)	yes_(colony,_usually_same_harem_as_close_spatially)	both	no	no	1	yes	yes
Monachus_schauinslandi	na	na	na	na	na	na	na	na	na	na	na	na	na	na	na	na	yes
Mungos_mungo	yes	yes	yes	no	yes	no	yes	unweaned	yes	yes	yes	both	yes	no	4	no	yes
Mus_musculus	yes	no	yes	yes	yes	no	yes	unweaned	yes	yes	yes	both	yes	no	4	no	yes
Myotis_myotis	na	na	na	na	na	na	na	na	na	na	na	na	na	no	na	na	na
Neophoca_cinerea	na	na	na	na	na	yes	yes	unweaned	yes	na	yes_(colony)	both	no	no	1	yes	yes
Neotoma_lepida	na	na	na	na	yes	no	yes	unweaned	yes	no	no	both	no	no	na	no	no
Nycticeius_humeralis	na	na	na	na	no	yes	yes	unweaned	yes	no	yes	both	no	no	1	yes	no
Odobenus_rosmarus	na	na	na	na	na	often	yes	unweaned	yes	na_(probably_not)	yes_(colony)	both	no	no	1	na	yes
Oryctolagus_cuniculus	yes	no	yes	no	yes	no	yes	newborns	yes	no	yes	both	yes	no	4	no	na
Otaria_flavescens	na	na	na	na	na	na	na	na	na	na	na	na	na	na	na	no	na
Otolemur_crassicaudatus	yes	yes	yes	yes	yes	no	yes	unweaned	yes	yes	yes	both	no	yes	2	yes	yes
Otolemur_garnettii	yes	yes	yes	yes	yes	yes	yes	unweaned	yes	yes	yes	both	no	yes	2	yes	yes
Pan_troglodytes	yes	no	yes	no	no	yes	yes	unweaned	no	no	yes	both	no	no	1	no	no
Panthera_leo	na	na	na	na	na	na	na	na	yes	no	no_	na	no	no	1	no	yes
Papio_cynocephalus	yes	no	yes	no	no	yes	yes	unweaned	no	no	yes	both	no	no	1	no	no
Papio_ursinus	yes	no	na	na	na	yes	yes	unweaned	no	no	yes	both	no	no	1	no	no
Peromyscus_leucopus	no	no	no	no	no	yes	yes	unweaned	yes	na	no	both	no	no	3	no	no
Peromyscus_maniculatus	no	no	no	no	no	yes	yes	unweaned	yes	na	no	both	no	no	3	no	no
Phacochoerus_aethiopicus	na	na	yes	no	na	yes	yes	na	yes	na	yes	na	na	no	1	na	na
Phodopus_campbelli	na	na	na	na	yes	no	yes	unweaned	yes	no	no	both	no	yes	na	no	no
Phodopus_sungorus	na	na	na	na	yes	no	yes	unweaned	yes	no	no	both	no	yes	na	no	no
Phyllostomus_hastatus	no	no	na	na	na	na	na	unweaned	yes	no	no	mainly_males	no	no	1	no	no
Phyllotis_darwini	na	na	na	na	na	na	na	na	na	na	na	na	na	na	na	na	na
Propithecus_edwardsi	yes	no	no	yes	no	na	no	unweaned	yes	no	no	na	no	no	1	no	no
Pteropus_hypomelanus	na	na	na	na	no	yes	yes	unweaned	yes	no	yes	both	no	yes	1	na	no
Pteropus_vampyrus	na	na	na	na	no	yes	yes	unweaned	yes	no	yes	both	no	yes	1	na	no
Rattus_norvegicus	na	na	no	yes	yes	no	yes	unweaned	yes	no	yes	both	yes	yes	na	na	yes
Rhabdomys_pumilio	no	no	yes	yes	yes	no	yes	unweaned	yes	yes	yes	both	yes	no	5	no	yes
Speothos_venaticus	yes	yes	yes	yes	na	no	na	unweaned	yes	yes	yes	both	yes	yes	2	no	yes
Spermophilus_beecheyi	yes	no	yes	no	no	yes	yes	unweaned	yes	no	yes_(neighboring_burrows)	both	no	no	5	no	no
Spermophilus_beldingii	no	no	no	yes	na	no	na	unweaned	yes	no	yes	both	no	no	3	no	no
Spermophilus_columbianus	na	na	yes	no	no	yes	yes	unweaned	yes	no	no	both	no	no	3	na	no
Suricata_suricatta	yes	yes_(rarely)	yes	yes	yes	no	yes	unweaned	yes	yes	yes	both	yes	no	4	no	yes
Sus_scrofa	yes	no	yes	no	yes	yes	yes	unweaned	yes	yes_and_no	yes	both	no	yes	4	no	no
Tadaria_brasiliensis	na	na	na	na	no	yes	yes	unweaned	yes	na	yes	na	no	no	1	yes	yes
Vulpes_lagopus	na	na	na	na	na	na	na	na	yes	no	no	both	no	no	na	no	yes
Vulpes_vulpes	na	na	na	na	no	yes	yes	unweaned	yes	no	no	both	no	no	2	no	no
Zalophus_californianus	na	na	na	na	na	yes	yes	newborns	yes	na	yes_(colony)	both	no	no	1	no	na
